# Supplementary material for: The sensitivity and specificity of the neurological examination in polyneuropathy patients with clinical and electrophysiological correlations
Source: PLoS One. 2017 Mar 1;12(3):e0171597. doi: 10.1371/journal.pone.0171597 (PMC5332032; doi:10.1371/journal.pone.0171597)
Supplement: S1 Dataset — (XLSX) [file pone.0171597.s001.xlsx]

## Sheet: PNP
														Clinical History					Clinical History			Exam							Exam			0 - Normal	1 - Reduced/Absent		Exam							Electrophysiology - First test
#	Age	Gender	DM	Duration	IGT	Duration	HTN	Hyperlipidemia	Statins	Thyroid Disease	Smoking	Heavy Alcohol	Duration	Weakness	Proximal	Distal	Pain	VAS	Sensory	Sensory symptoms		Sensory Deficit, 0=NL							Weakness	Weakness		Reflexes	Reflexes			Gait -Ab	Tandem - Ab	Sural Nerve		Median Sensory		Median Motor			Peroneal nerve			TA
				(Years)		(Years)			0 - No / 1 - Yes			1 - F / 2 - M	Symptoms		Weakness	Weakness			Symptoms	Proximal	Distal	0/1								Proximal	Distal		Upper limbs	Knee	Ankle Jerk			0-P		0-P	(Palm)		0-P			0-P		0-P
			0/1		0/1		0/1	0/1		0/1	0/1	0/1	Years	0/1	0/1	0/1	0/1	0-10	0/1	0/1	0/1	vibration	position	L.T	Pin prick	Temp.			0/1	0/1	0/1	0/1	0/1	0/1	0/1	0/1	0/1	Amp	CV	Amp	CV	DL	Wrist Amp	CV	DL	Ankle Amp	CV	Ankle Amp	CV
1	62	0	0		0		0	0		0	1	1	2	1	0	1	0		1	0	1	0	0	0	0	0	0	0	1	0	1	1	1	0	0	0	0			0		8.8	1.6	51	5.9	9	41
2	39	1	0		0		1	0		0	0	0	0.1	1	1	1	0		1	0	1	0	0	0	1	0	1	1	1	1	1	1	1	1	1	1	1	8.8	37	19	57	2.7	11.9	52	4.8	3.1	38
3	65	0	0		0		1	0		1	0	0	0.6	1	0	1	0		1	0	1	1	0	0	0	0	1	1	1	0	1	1	0	0	1	0	1	10.4	35	7.5	39	4.4	7.3	50		0		2	33
4	58	0	0		1		1	0		0	0	0	10	1	0	1	1		1	0	1	1	1	1	1	1	5	1	1	1	1	1	1	1	1	1	1	0		0		8.9	9.2	36		0		1.6	22
5	71	1	1	27			1	1		0	0	0	13	1	0	1	1	10	1	0	1	1	1	1	1	1	5	1	1	1	0	1	0	1	1	1	1	2.7	40	1.5	60	3	8.2	58	5.3	0.9	32
6	69	0	0		0		1	0		0	0	0	10	1	0	1	1	8	1	0	1	1	1	1	1	1	5	1	1	0	1	1	1	1	1	1	1	0		9.2	39	4.3	7.6	47		0		0.4	33
7	66	0	0		0		1	1		0	0	0	2	1	1	1	0		0	0	0	1	0	0	1	0	2	1	1	0	1	1	0	0	1	0	0	5.7	33	17.5	57	3.8	10.4	52	5.5	1.7	41
8	48	0	0		0		1	1		1	0	0	10	0	0	0	1	9	1	0	1	0	0	0	1	1	2	1	0	0	0	1	1	1	1	0	0	0							7.4	3.7	41
9	48	1	0		0		0	0		1	0	0	1	1	1	1	0		1	1	1	1	0	0	1	1	3	1	1	0	1	1	1	1	1	0	0	3.4	33	41.1	50	3.4	10.3	46	4.9	0.7	35
10	65	1	0		1		1	0		0	0	1	1	0	0	0	0		1	1	1	0	0	0	1	1	2	1	0	0	0	1	1	1	1	0	1	0		80.5	50	3.8	7.9	51	6.3	0.8	38	4.3	50
11	20	1	0		0		0	0		0	1	0	12	0	0	0	0		1	0	1	1	1	0	1	0	3	1	1	0	1	1	1	1	1	1	1	0		0		13.4	3.3	7		0		0.4	6
12	67	0	0		0		0	0		1	0	0	3	0	0	0	0		1	0	1	1	1	1	1	1	5	1	0	0	0	1	1	1	1	1	1	0		23	43	4.1	10.5	48	5.9	0.2	35	3.2	50
13	53	0	1	1			1	0		0	1	1	1	0	0	0	1	6	1	0	1	0	1	1	1	1	4	1	0	0	0	1	1	0	1	0	0	3.1	37	27.8	53	3.4	5.5	50	4.1	1.6	35
14	49	1	0		0		0	0		0	0	0	3	0	0	0	0		1	0	1	1	1	0	1	1	4	1	0	0	0	1	0	0	1	0	0	3.9	46	29.9	56	3.5	10.3	58	4.8	3.6	46
15	57	0	0		0		1	0		1	1	1	4	1	1	0	0		1	0	1	1	1	1	1	1	5	1	1	1	1	1	0	1	1			0		0		7.1	7.1	36		0		0.8	44
16	72	0	0		0		1	0		0	0	0	0.6	0	0	0	0		1	0	1	1	0	0	1	1	3	1	0	0	0	1	0	0	1	0	1	1.8	38	8.5	35	6.5	9.8	45	10.5	0.4	21	3.8	31
17	73	0	0		0		0	0		0	0	1	1	1	1	1	0		0	0	0	1	0	0	1	1	3	1	1	1	1	1	1	1	1	1	1	0		23	48	5.8	0.9	36	7	2.7	39
18	32	1	0		0		0	0		0	0	0	3	1	1	1	0		1	0	1	1	0	1	1	1	4	1	1	1	1	1	1	1	1	1	1	0		6.3	41	3.8	5.3	29	10.2	0.1	16	2.6	25
19	39	0	0		0		0	0		0	0	0	16	1	1	1	0	0	0	0	0	0	0	0	0	0	0	0	1	1	1	1	0	1	1	1	1	3.8	40	68	68	3.3	8	52	5	0.1	36	0.9	34
20	53	0	0		0		0	0		0	1	0	5	1	1	1	0		1	0	1	1	1	1	1	1	5	1	1	0	1	1	1	1	1	1	1	3.1	34	21.1	42	4.2	9.8	43		0		1.9	42
21	65	0	0	25			1	0		0	0	0	7	0	0	0	0		1	0	1	1	1	1	1	1	5	1	1	0	1	1	1	1	1	1	1	0		19.3	50	3.8	8.2	47		0		0.7	37
22	48	1	0		0		0	0		0	0	0	13	0	1	1	0		1	0	1	1	0	0	1	1	3	1	1	0	1	0	0	0	0	1	1	0		7.6	40		0			0
23	80	0	0		0		1	0		1	0	0	4	1	0	1	0		1	0	1		0						1	0	1	1	0	1	1	1	1	0		11.1	47	4.6	7.7	49	9.7	0.2	35	1.7	40
24	68	0	1	10			1	0		1	0	0	8	0	0	0	1	5	0	0	0	0	1	0	0	0	1	1	1	0	1	1	1	0	0	1	1	3.1	37	19.1	58	3.4	7.7	52	4	5.1	40
25	72	0	1	10			1	0		0	0	1	4	1	0	1	0		1	0	1	1	0	1	1	1	4	1	1	0	1	1	1	0	1	1	1	0		4.5	34	4.7	5.2	47	7	0.5	26	2.3	35
26	52	0	0		0		1	1		0	1	1	3	0	0	0	0		1	0	1	1	0	0	1	1	3	1	0	0	0	0	0	0	0	0	0	7	37	89.1	44	3.8	8.3	51	4.5	5	38
27	67	0	0		0		0	0		0	0	0	1	0	0	1	1	7	1	0	1	1	1	1	1	0	4	1	1	0	1	1	1	1	1	0	0	5	42	43.5	47	3.8	11.9	53	5.3	0.9	40	3.8	57
28	62	0	0		0		0	0		0	0	0	1	0	0	0	1		1	0	1	0	0	0	0	0	0	0	0	0	0	1	1	1	1	1	1	0		15	48	3.7	8.2	50	5.3	0.3	31	3.9	38
29	70	0	0		0		0	0		0	0	1	2	1	1	1	0		1	0	1	1	1	1	1	1	5	1	1	1	1	1	1	1	1	1	1	0		12.3	47	3.9	5.3	47	6.9	0.1	31	5.2	42
30	50	0	0	1			0	0		0	0	0	1	0	0	0	1	6	1	0	1	1	1	0	1	1	4	1	1	0	1	1	1	1	1	0	0	0		0		5.8	4.4	46		0		3.5	43
31	74	0	0		0		1	0		0	0	0	5	0	0	0	0		1	0	1	1	0	0	1	1	3	1	0	0	0	1	1	1	1	0	0	3.7	41	14.8	42	4.5	11.1	50	5.2	7.6	40
32	66	0	0		0		1	0		0	0	0	1	0	0	0	1		1	0	1	1	0	1	1	1	4	1	1	1	1	1	0	0	1	0	0	3.6	37	98.1	50	4.1	8.7	57	4.5	3.9	41
33	65	0	0		0		1	1		0	1	0	13	0	0	0			1	0	1	1	0	0	1	1	3	1	0	0	0	1	0	1	1	0	0	6.1	42	2.8	48	4.8	3.4	45	6.6	1.6	35
34	40	0	0		0		0	0		0	1	0	0.333333	1	0	1	0		1	0	1	0	0	0	0	0	0	0	1	0	1	1	1	1	1	1	0			31.5	53	3.7	5.4	48	1.4	5.2	46
35	82	0	1	3.5			0	0		0	0	0	3	0	0	0	0		1	0	1	1	0	1	1	1	4	1	0	0	0	1	1	1	1		1	0		6.3	47	3.7	5.8	43	4.5	0.3	32	2.7	37
36	22	0	0		0		0	0		0	1	0	2	1	1	0	0		1	1	0	0	0	0	0	0	0	0	1	1	0	1	1	1	1	0	0	24.4	42	30.5	43	5.9	12.7	52
37	73	1	0		0		0	0		0	0	0	2																0	0	0	0	0	0	0		0								3.5	2.4	43
38	69	0	0		0		0	0		1	1	0	2	1	1	0	1		1	0	1	1	1	1	1	1	5	1	0	0	0	0	0	0	0	0	1	0		65.3	57	3.4	8.3	56	4.4	4.2	41
39	82	0	0		0		0	0		0	0	0	1	0	0	0	1		1	0	1	1	1	0	1	1	4	1	0	0	0	1	0	0	1	0	1	0		0		9.1	5.2	47		0		3	59
40	72	0	0		0		1	0		0	0	0	10	0	0	0	1		1	0	1	1			1	1	3	1	1	0	1	1	0	1	1	0		7.3	39	61.5	62	2.9	7.1	45	6.2	1.1	27
41	48	0	0		0		0	0		0	0	0	2	0	0	0	0		1	0	1	1	0	0	1	1	3	1	0	0	0	1	1	1	1	0	0	5.1	44	75.9	57	3.7	13.1	55	5	3.2	41
42	26	1	0		0		0	0		0	1	0										0	0						0	0	0	0	0	0	0	0		4.2	37	39.2	62	3.5	13.8	54	4.7	6.5	35
43	77	0	0		0		1	0		0	0	1	3	1	1	1	0		1	0	1	1	0	0	1	1	3	1	0	0	0	0	0	0	0	1	1	2.5	41	24.5	55	3.6	7.3	52	5.5	1.6	35
44	72	0	0		0		1			1	0	0	10	0	0	0	0		1	0	1	1	1	1	1	1	5	1	0	0	0	0	0	0	0	0	1	1.9	39	15.8	44	3.8	2.5	51	6.8	0.2	39	3.3	47
45	69	0	0		1		1	1		0	0	0		0	0	0	0		1	0	1	1	0		0	0	1	1	0	0	0	0	0	0	0	0		3.1	42	43	62	3.5	10.5	54	5	3.4	41
46	60	0	0		0		0	1		0	0	0	10	0	0	0	1		1	0	1	1	1		1	1	4	1	1	0	1	1	1	0	1	1	1	3.5	45							0		3.9	43
47	67	0	1	17			1	0		0	0	0	1	1			1		0	0	0	1	0	0	0	0	1	1	1	0	1	1	1	1	1	1	1	2.5	34	3.4	27	6.2	1.7	41	5.4	0.1	25	2.8	37
48	26	1	0		0		0	0		0	0	0	4	1	0	1	0		1	0	1	0	0	0	0	0	0	0	1	0	1	1	0	0	1	0	0	3	38.9						7.4	1.2	31.9
49	74	1	0		0		0	1		0	0	0	13	1	0	1	0		1	0	1	1	1		1	1	4	1	1	1	1	1	1	1	1	1	1	0		2.7	50	4.2	2.5	38		0		0.2	36
50	46	1	0		0		0	0		0	0	0	30	0	0	0	0		1	0	1	0	0	0	1	1	2	1	1	0	1	1	0	0	1	0	0	0		8.4	20	8	7.3	31	10.9	2.7	25
51	74	0	0		0		1	0		0	0	0	24	1	0	1			1	0	1	0	1	0	1	0	2	1	1	1	1	1	1	1	1			0		7.5	62	3.6	9.1	53	3.8	2.4	41
52	76	0	0		0		0	0		0	0	0	0.5	0	0	0	0		1	0	1	1	0	0	1	1	3	1	0	0	0	1	1	1	1	0	0	2.9	39	27.5	50	3.7	5	51	6.1	0.7	29	4.7	44
53	29	1	0		0		0	0		0	0	0	0.5	1	0	1	0		1	0	1	0	0	0	0	0	0	0	1	0	1	1	1	1	1	0	0	0		0		9.9	2.2	17	15	0.3	16	2.7	16
54	55	1	1	20	0		1	1		0	0	0							1	0	1															0	0	3.1	40	18	35	4.5	8.4	50	4.5	5.1	41
55	74	0	1	20			1	0		0	1	0	3	1	0	1	1		1	0	1	1	0	1	1	1	4	1	0	0	0	1	1	1	1	0	1	4.7	45	46.9	57	3.3	9.2	57	4.8	3.9	44
56	70	0	0		0		0	0		0	0	0	1	0	0	0	1	6	1	0	1	0	0	0	0	1	1	1	0	0	0	1	0	0	1	0	1	0		10.3	37	4.8	2.8	41		0		3.4	54
57	52	0	0		0		0	0		0	0	0	0.83	1			1		1	1	1	0	1	1	1	1	4	1	1	1	0	1	0	0	1	0	1	2.2	44	25.1	67	3.1	9.6	55	4.9	3.2	41
58	55	1	0		0		0	0		0	1	2	4.5	0	0	0	0		1	0	1	1	0		1	1	3	1	1	0	1	1	1	1	1	0	0	2.5	42	0		9.9	1.4	38	0	0		3.8	40
59	65	0	0		0		0	0		0	0	0	3	0	0	0	0		1	0	1	0	0	0	1	1	2	1	0	0	0	0	0	0	0	0	0	3.7	43	9	31	5	6.2	63	5.9	4.3	49
60	78	0	1	6							0	1	8	1			1		1	1	1	1	1	1	1	1	5	1	0	0	0	1	0	1	1	0	1	0		26.4	45	4.4	5.6	49	4.1	0.9	37
61	81	0	1	10			1	1		0		0	1	1			1	6	1	0	1	1	1	1	1	1	5	1	1	1	1	1	1	1	1	1	1	0		14.8	30	5.5	8.1	43	5.1	0.3	34	4	41
62	54	0	1	6			1	1		0	1	0							1	0	1																	0		6.5	38	5	4.4	37		0		2.6	33
63	28	1	0		0		0	0		0	0	0	3				1		1	0	1	0	0	0	1	1	2	1										2.6	37						5.6	0.1	40	0
64	56	1	0		0		0	0		0	0	0	2.5	0	0	0	1		1	0	1	1	1		1	1	4	1	1	0	1	1	1	1	1	1	1	4	38	36.4	53	3.3	10.9	57	5.2	3.6	41
65	68	0	1	40			1			0	0	0	30	0	0	0	0		1	0	1	1	1	0	1	1	4	1	0	0	0	1	0	0	1	0	0	2.7	36	35.7	38	4.6	9.1	53	5.5	1.8	33
66	58	0	0		0		0	0		0	1	0	3	0	0	0	1	6	1	0	1	0	0	0	1	0	1	1	1	0	0	0	0	0	0	0	0	4.9	40	18.4	40	4.5	6.1	53	6.3	3.2	41
67	56	1	0		0		1	0		0	0	0	0.83	1	0	1	0		1	0	1		0		1		1	1	1	0	1	1	1	1	1	0	0	11.3	45	0		10	4.5	41	8.3	2.4	34
68	60	1	0		0		0	0		0	0	0	1				0		1	0	1	0	0	0	0	0	0	0	1	0	1	1						0		7.6	44	4.2	5.5	50	5.7	0.1	38	2	42
69	73	0	1	19			1			0	0	0																										0		13.3	35	4.8	10.2	43		0		0.6	33
70	86	0	0		0		1	0		0	0	0	4	1	1	0	0		1	0	1	1	1		1		3	1	1	0	1	1	1	0	1	1	1	0		19.2	53	4.2	4.7	50	5	1.2	29
71	68	0	0		0		0	0		0	0	0	15	0	0	0	1		1	0	1	1	1	0	1	1	4	1	1	0	1	1	1	1	1	1	0	2.6	42	35.8	57	3.4	11.1	52	4.7	1.1	39
72	56	0	1	36			0	0		0	0	0	3	0	0	0	1	2.5	1	0	1	0	0	1	0	0	1	1	0	0	0	1	1	1	1	0	0	2.7	48	12.1	34	4.7	8.5	53	4.5	1.1	40
73	56	0	0		0		0	0		0	0	0		0	0	0	0	0	0	0	0	0	0	0	1	0	1	1	0	0	0	0	0	0	0	0	0	2.3	44	68.3	62	2.7	13.5	61	4.4	1.5	45
74	54	0	1	10			0	0		0	0	0	5	1	0	0	0		1	0	1	1	1	0	1	1	4	1	1	1	1	1	1	1	1	1	1	0		0		9.1	2	37		0		1.2	30
75	67	0	1	40			1			0	0	0	8	1		1			1	0	1	1	1	0	1	1	4	1	1	0	1	1	0	0	1	1	1	0		3.2	35	4.6	6.8	38		0
76	58	0	0		0		1	0		0	0	0	1	0	0	0	1		1	0	1	1	1		1	1	4	1	1	0	1	0	0	0	0	0	1	2.3	44	17.8	47	4.4	7.6	47		0		4.2	43
77	66	0	0		0		0	0		0	0	0		0	0	0	0	0	0	0	0	0	0	0	0	0	0	0	0	0	0		0	0				3.6	38	13.5	62	3.6	11.4	55
78	76	0	0		0		0	1		0	0	0	1	0	0	0	0		0	0	0	1	1		1	1	4	1	1	1	1	1	0	0	1	1		0		41.3	50	4.5	4.6	51	6.3	0.1	31	2.2	40
79	74	0	1	20			1				0	0	6	1	0	1	1		1	0	1	0	0	0	1	1	2	1	1	1	1	1	0	0	1	1	1	6.8	48	3.6	30	6.7	5.1	51	3.8	3.6	43
80	51	0	1	4			0	0		0	0	0	2	0	0	0	1		1	0	1	1	1		1	1	4	1	0	0	0	1	1	1	1	0	0	1.6	36	21.6	61	3.2	11.5	53	6.3	1.3	34
81	70	1	0		0		1	0		0	0	0	4	0	0	0			1	0	1	1		1			2	1	0	0	0	1	0	1	1	0		2.1	39	34.3	57	3.2	8.9	55	5.1	2.5	41
82	44	1	0		0		0	0		0	0	0	2	1					1			1	1		1	0	3	1	0	0	0	1	1	1	1	1	1	2.5	41	0		2.7	14	59	4.8	7.9	48
83	68	0	0		0		1	0		0	0	1	2.5	0	0	0			1	0	1	1	1	0	1	1	4	1	0	0	0	0	0	0	0	1	1	0		35.6	43	4.1	4.5	47	5.5	3.3	37
84	55	0	0		0		1	1		1	0	0	32	1	1	1	0		0	0	0	1	0		0		1	1	1	1	1	1	1	1	1	1	1	14.1	50	54.8	62	3.8	1.3	47	5	3.4	39
85	64	0	0		0		1				0	1	12	0	0	0	1	4	1	0	1	1	0		1		2	1	0	0	0	1	0	0	1	0	1	2.2	39	35.5	53	3.5	8.3	55	4.8	4.2	41
86	67	0	0		0		0	1		0	0	0	2	0	0		0		1	0	1	1	0	0	1	1	3	1	0	0	0	1	1	1	1	0	1	3.1	38	35	57	3.7	9.2	53	4.9	1	31
87	62	0	1	7			1	0		0	0	0							1	0	1	1		0	1	1	3	1	0	0	0	1	1	1	1	1	1	0				3.8	6.6
88	68	0	1	10				0		0	1	0																										0		21.5	53	3.8	6.5	52	4.5	3.1	39
89	46	1	1	6						0	0	0																										2.9	37	43.9	47	4.5	8.6	58	4.1	2.3	42
90	56	1	1	16			0			0	0	0	3	0	0	0	1	10	1	0	1	0	0	1	0	0	1	1	0	0	0	0	0	0	0			4	35	4.4	35	4.1	6.2	41	4.1	6.2	41
91	89	1	0		0		0	0		1	0	0	2	0	0	0	0		1	0	0	0	0	1	1	1	3	1	1	0	1	1	1	1	1	1	1	0		21.7	48	4.2	6.9	51		0		1.3	50
92	52	0	0		0		0	0		0	0	0	10	1	0	1	0		1	0	1	0	0	0	0	0	0	0	0	0	0	0	0	0	0	0	0	5.6	40	37.1	57	3.2	9.4	59	4.3	4.1	40
93	75	0	0		0		0	0		0	0	0	1.5	0	0	0	1	1.5	1	0	1	1	0	1	1	1	4	1	0	0	0	0	0	0	0	0	0	4.3	38	32.5	57	3.4	5.3	53	5.6	3.2	41
94	68	0	0		1	1	0	0		0	0	1	2	1			1	8	1	0	1	1	0	0	1	1	3	1	0	0	0	0	0	0	0	0	0	3.9	41	58.4	57	3.5	12.3	57	5.3	2.6	40
95	52	0	1	10			0	0		0	0	0	0.583333	0	0	0	1	7	1	0	1	0	0	1	0	1	2	1	0	0	0	1	1	1	1	0	0	0		21.9	47	3.9	11.5	40	5.5	1.6	28
96	49	0	0		0		1	0		0	0	1	30	1					1	0	1	1	1	1	1		4	1	1	0	1	1	1	1	1	1	1	0		0		8.8	6	24	12.3	0.3	18
97	74	0	1	6			1	1		0	0	0	6.5	1	1				1	0	1	1	1		1		3	1	1	0	1	1	0	0	1	1	1	0		5.2	40	4.8	10.6	38	9	0.3	23
98	74	0	1	6			1	1		0	0	1	2				0		0	0	0	1	1	0	0		2	1	0	0	0	1	1	0	1			0		10.5	53	3.9	6.6	51	6.9	0.5	31
99	74	0	0		0		0	0		0	0	0	5	1	1	1						1	1	0	1	1	4	1	1	0	1	1	1	1	1	1	1	0		0		9.6	0.8	22		0
100	57	0	1	8			0	0		0	0	0	2	0	0	0			1	0	1	1	0	1	1	1	4	1	0	0	0	1	1	1	1	0	0	3.4	37	30.6	57	3	8.9	50	5.4	1	29
101	51	0	1	18			0	0		0	0	0	4	0	0	0	0		1	0	1	1	1	0	1	1	4	1	0	0	0	1	1	1	1	0	1	0		17.3	53	3.5	14.9	43		0
102	83	0	0		0		1	1		0	0	0																										0		21.9	53	3.8	8.7	50	4.2	1.2	42
103	81	0	1	15			0			1	0	1	5	0	0	0			1	0	1	1	0	1	1		3	1	0	0	0	1	1	0	1	0	1	2.4	37	23.9	45	4.7	6.2	54	4.1	3.2	45
104	46	0	1	10			0	0		0	0	0	1.17	1	1	0	1		1	1	1	1	0	0	1	1	3	1	1	1	1	1	1	1	1	1	1	0		14.9	53	3.8	8.5	52	5.5	0.4	26
105	78	1	0		0		0	0		0	0	0	15				1		1	0	1	1			1		2	1	1	0	1	1	1	1	1	1	1	0		24.9	53	3.3	6.7	53	5.3	0.2	35
106	66	1	0		0		0	0		0	0	1	3	0	0	0	0		1	0	1	1	1		1		3	1	1	0	1	1	0	1	1	0	1	4.4	45	24.5	50	3.9	5.9	54	4.4	0.6	40
107	55	0	0		0		1	0		0	0	0										1	0	0	1	1	3	1	1	0	1	1	1	1	1			3.4	35	9.4	42		0			0
108	54	1	0		0		1	0		0	0	0	5				1	9	1	0	1	1	1	0	1	1	4	1	0	0	0	0	0	0	0	0	0	1.8	45	28	44	3.4	6.9	55	3.8	3.4	39
109	82	0	0		0		1	1		1	0	0							1	0	1	1	1	0	1	1	4	1	1	0	1	1	1	1	1	1	1	0		19.7	53	3.6	9.6	53	5	0.6	34
110	44	0	0		0		0	0		0	1	1	3.5				1	10	1	1	1	1	1		1		3	1	1	1	1	1	1	1	1	1	1	1.8	44	19.6	67	2.8	9	53	4.1	3.8	38
111	63	0	1	3			1	1		0	1	0	3				1	8	1	0	1	1	0	0	1	1	3	1	0	0	0	1	0	0	1	1	1	0		13.4	38	5.5	3.1	41	6.9	0.6	29
112	58	0	0		0		1	0		0	0	0	1				1		1	0	1	1	0	0	1	1	3	1	1	0	1	1	1	1	1	0	0	0		25.6	53	4.2	14.2	50	4.8	1.9	32
113	77	0	1	20							0	0		0	0	0	0		0	0	0	0	0	0	0	0	0	0	0	0	0	0	0	0	0	0	0	2	39	34.6	57	3.1	10.7	58	5	4.1	40
114	71	1	0		0		0	0		1	0	0	3				1	9	1	0	1	0	0	0	1	1	2	1	0	0	0		0	0	0	1	1	2.4	46	18.4	38	4.3	4.5	56	3	3.1	49
115	76	1	0		0		1	0		0	0	0	8	1	1	0			1	0	1	1	1		1		3	1	1	1	1	1	1	1	1	1	1			2.9	25	15.1	1.2	22		0
116	54	1	0		0		1	0		0	0	1	8	1	0	1	1	10	1	0	1	1	1	1	1		4	1	1	0	1	1	0	0	1	1	1	0		21.9	57	3	8.4	51	4.8	0.1	28
117	50	0	0		0		1	0		0	0	0	1				1	5	1	1	1	1	0	1	1	1	4	1	0	0	0	1	0	0	1	0	1	3.5	46	32.9	62	3	13.5	54	4.1	1.8	37
118	66	0	0		0		1	0		0	0	0	5	1	0	1			1	0	1	0	0	0	1	0	1	1	1	0	1	0	0	0	0	1	1	10.4	45	62	62	3	11.9	59		0
119	67	0	0		0		0	0		0	0	0	4.5	0	0	0	1	4.5	1	0	1	0	0	0	0	0	0	0	0	0	0	1	0	0	1	1	1	4.1	42	37.3	53	3,6	3.9	52	4.3	3.4	46
120	67	0	1	4			1	1		0	0	0	1	0	0	0	0		1	0	1	1	0	1	1	1	4	1	0	0	0	1	1	1	1	1	1	0		6.4	51	4.5	7.2	51		0
121	63	0	0		0		0	0		0	0	0										1	1	0			2	1	0	0	0							1.6	43	11.4	37	4.8	8	45	5.9	3.5	40
122	65	0	0		0		1	0		0	0	0	3	1	1	0	0		1	0	1	1	1	0	1	1	4	1	0	0	0	1	0	1	1	1	1	0		12.8	44	4.5	11.2	51	4	4	41
123	67	1	0		0		0	0		0	0	0	10	1	1	1			1	0	1	1	1	0			2	1	1	0	1	1	0	1	1	0	1	0		22.4	38	4.6	7.4	42	4.7	0.4	32
124	69	0	0		0		0	0		0	0	0										1			1	1	3	1	1	0	1	1	0	0	1			0		45.9	57	3.5	7.3	50	5.1	0.2	36
125	71	0	0		0		1	1		0	0	0	9	1	0	1	0		1	0	1	1	1	1	1	1	5	1	1	0	1	1	0	0	1					6.1	37	5.5	8.9	37
126	47	1	0		0		0	0		0	0	0	0.916667	1	1	0	0		1	1	1	1	1		1	1	4	1	1	1	1	1	1	1	1	1	1	0		19	53	3.8	4.5	37		0
127	53	1	0		0		0	0		0	0	0	1.5	0	0	0	0		1	0	1	0	0	0	1	0	1	1	0	0	0	1	0	1	1	0	0	0		18.6	40	5	7.3	51	4.1	1.9	40
128	55	1	0		0		0	0		0	0	0	1	0	0	0	1		1	0	1	1	1	0	0	0	2	1	1	1	1	1	1	1	1	1	1	0		0		12.3	0.9	23	12	0.2	21
129	62	0	1	8			1			0	0	0	2.5	0	0	0	1	6.5	1	0	1	1	0	1	1	1	4	1	0	0	0	1	1	0	0	0	1	5.7	40	15.4	40	4.6	10.6	54	4.6	3.9	39
130	83	0	1	10			1				0	0	5	0	0	0	0		1	0	1	1	0	1	1	1	4	1	0	0	0	1	1	1	1	1	1	3.2	40	39.8	50	4.1	6.7	49	4.5	0.5	41
131	47	0	0		0		0	0		0	0	0	2	1	1	1	1		1	0	1	0			1		1	1	1	1	1	0	0	0	0	0	0	6.7	45	25.3	63	3.7	4	46	5.1	5.1	46
132	41	0	0		0		0	0		0	1	0	0.583333	1			0		1	0	1	1	1	1	1		4	1	1	1	1	1	1	1	1	1	1	0		25.2	40	5.1	11	42		0
133	61	0	0		0		0	0		1	0	0	0	1	0	1	1		1	0	1	1	1	0	1	1	4	1	0	0	0	0	0	0	0	1	1	2.5	37	6.9	43	4.3	8.5	50	5.6	1.2	33
134	61	0	0		0		0	0		1	1	0	2	0	0	0	0		1	0	1	1	1	1	0	1	4	1	0	0	0	1	1	1	1	1	1	2.7	42						4	6.1	42
135	19	0	1	4.5			0	0		0	1	0	1.25	1	1	1	1	9	1	0	1	1	0		1		2	1	0	0	0	1	1	0	1	0	1	4.7	30	24.7	40	4.5	11	50	5.2	3.2	33
136	46	0	0		0		0	0		0	0	0	1	0	0	0	0		1	0	1	1	1	0	1	0	3	1	0	0	0	1	1	1	1	0	0	2.5	43	88.2	62	3.2	10.9	60	4.7	4.2	46
137	56	0	0		0		1	0		0	0	0	1	1	1	0	0		1	1	1	1	0	0	1	1	3	1	1	1	1	0	0	0	0	1	0	2.4	35	8	38	5.2	8.4	42	5.8	0.9	37
138	65	1	0		0		0	0		0	0	0		0			1		0	0	0	1	1		1		3	1	1	0	1	1	1	1	1	1	1	10.1	45	16.4	50	3.5	9.6	55	4.6	2.4	38
139	83	1	1	25			1	1		0	0	0	1	0	0	0	1	6.5	1	0	1	1	1	1	1	1	5	1	0	0	0	1	0	1	0	1	1	0		9	41	4.4	9.1	50	5.8	2.1	35
140	27	0	0				1	0		0	1	0		0	0	0	0		0	0	0	1						1	0	0	0	1	1	0	1	0		0		0		4.5	3.9	29		0
141	57	1	0				1	0		0	1	0	6	0	0	0	1		1	0	1	1	1	0	0	0	2	1	0	0	0	0	0	1	1	0	0	1	44	4.6	54	3.8	12.4	56	5.1	5.8	46
142	51	1	0				0	0		0	1	0	30	1		1	0		0	0	0	0	0	0	0	0	0	0	1	0	1	1	0	1	1	1	1			10	36	4.3	0.2	30
143	72	1	0				0	0		0	0	0	5	1	0	1	0		1	0	1	0	0	0	0	0	0	0	0	0	0	0	0	0	0	0	0	2.5	42	14	53	3.8	8.4	52	4.7	2.6	44
144	71	0	1	8			1	1		0	1	0	3	1	1	0	1	7	1	0	1	1	0	1	1	1	4	1	0	0	0	1	1	1	1	1	1	5	37	15.6	57	3.7	8.7	54	5.1	4	42
145	50	0	1	26			1	1		1	1	0	2	0	0	0	1	6	1	0	1	1	0	1	1	1	4	1	0	0	0	1	1	1	1	0	0	2.5	36	45.3	57	3.5	11.5	53	4.9	0.9	30
146	62	0	1	20			1	1		0	0	0	2	1	1	1	1		1	1	1	1	0	1	1	1	4	1	0	0	0	0	0	0	0	1	1	0		0		5.7	0.6	41	4.8	1.7	35
147	55	0	0				1	0		0	0	0	5	0	0	0	1	2	1	0	1	1	0	1	1	1	4	1	0	0	0	0	0	0	0	0		1.2	37	10.6	32	5.6	7.6	53	5.2	5.2	40
148	56	0	0				1	0		0	1	0	16:00:28.800000	0	0	0	1	8	1	0	1	1	0	1	1	0	3	1	0	0	0	1	1	0	0	1		2.7	33	8	44		0		5.8	0.3	30
149	56	0	0				1	0		0	0	1	2	0	0	0	1	8	1	1	1	0	0	0	0	0	0	0	0	0	0	0	0	0	0	0	0	5	54	40.9	54	2.7	12.3	59	4.3	3.4	42
150	55	1	0				1	1		1	0	0	1.5	0	0	0	1		1	0	1	0	0	0	0	0	0	0	0	0	0	0	0	0	0	0	0	1.6	40	9.2	62	3	6.1	45	4.3	2	39
151	36	0	0				1	0		0	0	0	30	0	0	0	0		1	0	1	1	0	0	0	0	1	1	0	0	0	1	1	1	1	0	0	0		0		10.5	5.7	29	16.1	0.6	18
152	53	0	1	2			0	1		0	1	0	4	0	0	0	1	8	1	0	1	1	0	1	1	1	4	1	0	0	0	1	1	1	1	1	1	0		1.7	42	4.4	7.1	50	5	0.3	25
153	67	1	1	10			1	1		0	0	0	4	1	1	1	1	9	0	0	0	1	0	1	1	1	4	1	0	0	0	1	1	1	1	1	1	0		9.6	47	4.5	4.4	46		0
154	71	0	0				0	0		0	0	1	2	0	0	0	1		1	0	1	1	1	1	1	1	5	1	0	0	0	1	0	1	1	0	1	0		9.6	50	3.3	8.4	56	4.9	3.9	42
155	53	0	0				0	0		0	1	1	12	0	0	0	0		1	1	0	0	0	1	1	1	3	1	0	0	0	0	0	0	0	0	0	2.3	38	32.9	57	3.8	6.7	52	4.9	5.4	41
156	61	0	0				0	0		0	1	0	4	0	0	0	1	10	1	0	1	0	0	0	0	0	0	0	0	0	0	0	0	0	0	0	0	2.5	33	15.9	37	4.5	6.2	48	4.9	1.4	36
157	45	0	0				0	0		0	0	0	3	1	0	1	0		0	0	0	0	0	0	0	0	0	0	1	0	1	0	0	0	0	0	0			39	47	4.7	3.9	33
158	76	0	0				0	0		0	0	0	1	0	0	0	0		1	0	1	1	1	1	1	1	5	1	0	0	0	1	0	1	1	0	0	0		11.6	53	3.8	4.2	47	7.1	0.2	24
159	63	0	1	23			1	0		0	0	0	1.5	1	1	1	0		1	1	1	1	0	1	1	1	4	1	1	0	1	1	0	1	1	1		0		16	45	4.5	11	60	6.5	0.1	32
160	54	0	0				0	0		0	0	0	1	0	0	0	1		1	0	1	1	0	1	1	1	4	1	0	0	0	1	1	1	1	0	0	6.9	40	97.6	53	3.8	11.1	58	4.8	1.8	43
161	51	0	1	10			0	1		0	1	0	3	1	0	1			1	0	1	0	1	0	1	1	3	1	1	0	1	1	0	0	1	1	1	2.6	39	29.5	53	3.5	9.4	54	7.3	0.2	28
162	56	0	1	4			1	0		0	0	0	2	0	0	0	1	10	1	0	1	1	1	1	1	1	5	1	0	0	0	1	1	1	1	1	1	0		6.5	33	5.2	5.7	50	5.9	0.1	29
163	48	0	1	1.5			0	0		0	0	0	1.75	1	1	1	1		1	0	1	1	1	1	1	1	5	1	0	0	0	0	0	0	0	1	1	0		17.6	35	5.5	13	51	6.2	0.7	36
164	50	1	0				0	0		0	0	0	1	0	0	0	1	7	1	1	1	0	0	0	1	0	1	1	0	0	0	0	0	0	0	0		5.9	36	36	39	4	10	58	4.7	4.9	46
165	59	1	0				0	0		0	1	0	0.333	1	0	1	0		1	0	1	0	1	1	1	1	4	1	1	0	1	1	0	0	1	1	1	0		71.3	50	3.8	16.6	52		0
166	56	1	0				0	0		0	0	0	5	0	0	0	0		1	0	1	0	0	0	0	0	0	0	0	0	0	1	0	0	1	0	0	0		44.3	57	2.8	12.3	55	7.7	0.1
167	85	1	0				0	0		0	0	0	3	0	0	0	1	8	1	1	0	0	0	0	0	0	0	0	0	0	0	1	0	0	1	0		0		91.7	67	3.4	8.9	59	3.4	1.6	41
168	58	0	0				0	1		0	0	0	2	0	0	0	0		1	0	1	0	0	0	0	0	0	0	0	0	0	0	0	0	0	0	0	3.7	44	28.4	56	4.1	6.4	51	4.5	2.7	39
169	64	0	1	9			0	0		0	1	0	5	1	0	1	1	10	1	0	1	1	1	1	1	1	5	1	1	1	1	1	1	1	1	1	1	0		13.6	50	4	7.9	41		0
170	79	1	1	3			1	0		0	0	1	6	0	0	0	1	5	0	0	0	1	1	1	1	1	5	1	0	0	0	1	0	1	1	0	1	1.9	43	3.9	44	6.1	7.5	50	3	1.2	44
171	53	0	1	20			0	0		0	0	0	5	0	0	0	1	8	0	0	0	1	1	1	1	1	5	1	1	0	1	1	1	1	1	1	0	0		0		5.3	5.9	36		0
172	52	1	1	3			1	0		0	0	0	2	0	0	0	0		1	0	1	0	0	0	0	0	0	0	0	0	0	0	0	0	0	0		4.4	37	81.3	53	3.8	17.3	51	5.9	3.3	36
173	60	0	0				1	0		0	0	0	10	1	0	1	0		0	0	0	1	1	1	1	1	5	1	1	0	1	1	1	1	1	1	1	0				5.2	6.2	34	8.3	0	24
174	61	0	1	8			0	0		0	0	1	2	0	0	0	0		0	0	0	1	1	1	1	1	5	1	0	0	0	1	0	1	1	0	0	9.6	50	71.1	65	2.7	4.5	61	4.1	1.6	45
175	32	1	0				0	0		0	0	0	2	0	0	0	1		1	1	1	0	0	0	1	0	1	1	0	0	0	1	0	0	1	1	0	5.5	42	85.6	62	3	9.6	58	5.6	2.9	45
176	45	1	0				0	0		0	0	0	17	1	1	1	0		1	0	1	0	0	0	0	0	0	0	0	0	0	1	1	1	1	0	0	15.9	48	93	64	4.6	4.6	43	4.7	5.3	45
177	76	0	0				1	0		0	0	0	5	0	0	0	1	5	1	0	1	1	1	1	1	1	5	1	0	0	0	1	1	1	1	1	1	2.1	36	8.4	57	3.9	7	52	6	0.2	31
178	89	0	0				0	0		0	0	0	10	0	0	0	0		1	0	1	1	0	0	0	0	1	1	0	0	0	0	0	0	0	1	1	0		24.9	40	5.2	4.3	56	5.4	1.6	38
179	54	0	0				0	0		0	1	1	10	1	0	1	0		1	0	1	1	1	1	1	1	5	1	1	0	1	1	1	1	1	0	0	0		13.3	37	4.5	7.9	50	6.6	0.1	47
180	61	1	1	8			1	1		0	1		2	0	0	0	0		1	0	1	0	0	0	1	0	1	1	0	0	0	1	1	0	1	1		3.8	39	60.1	57	3.3	7.8	56	4.8	1.4	38
181	62	0	0				0	0		0	0	0	10	0	0	0	0		1	0	1	1	0	0	1	0	2	1	0	0	0	1	1	1	1	0		0		44.6	62	3.3	12.5	55	4.2	1.8	37
182	51	0	0				1	0		0	1	1	2	0	0	0	0		1	0	1	1	1	1	1	0	4	1	0	0	0	1	1	0	0	0		0		9.2	50	3.6	4.6	51	5.1	1.1	29
183	65	1	0				1	0		0	0	0	10	1	0	1	0		1	0	1	1	1	1	1	1	5	1	0	0	0	1	0	0	1	0		0		13.6	35	6.3	4.6	32		0
184	73	0					0	0		0	0	1	0.75	0	0	0	0		1	0	1	1	0	0	0	0	1	1	0	0	0	0	0	0	0	0	0	3.1	44	3	31	5.5	8	55	4.4	2.9	44
185	59	0	0				0	0		0	1	0	8	1	0	1	0		1	0	1	1	0	0	0	0	1	1	1	0	1	1	0	0	1	0		0		33.3	53	2.7	11	60		0
186	57	0	1	10			0	1		0	1	0	5	1	0	1	0		1	0	1	1	1	1	1	1	5	1	1	0	1	1	0	1	1	1		0		7.9	57	4.1	4.9	37		0
187	62	1	0		0		0	0		0	1	0	21	1	1	0	1		1	0	1	1	1	0	1	0	3	1	1	1	1	1	0	1	1	1	1	6.5	50	15.8	40	4.8	10.8	43	5.1	2.8	40
188	58	0	0		0		0	0		0	0	0	1	0	0	0	0		1	0	1	0	0	0	0	0	0	0	0	0	0	1	0	0	1	0	0	5.3	44	38.8	50	3.1	11.4	50	6.5	0.9	34
189	71	0	0				1	0		0	1	1	4	1	0	1	0		1	0	1	1	1	0	1	1	4	1	0	0	0	1	1	0	1	1	1	1.9	33	9.4	50	4.1	4.9	50	8.6	0.2	31
190	71	0	0		0		0	0		0	0	0	2	0	0	0	0		1	0	1	1	0	0	0	0	1	1	0	0	0	1	1	0	1	0	0	0		11.6	42	4	13.7	53	4.9	4.1	42
191	38	0	1	7			0	0		0	1	0	3	0	0	0	1	6	1	0	1	0	0	0	1	0	1	1	0	0	0	1	1	1	1	0	0	3.7	42	36.6	62	3.2	12.7	51	5.8	0.8	30
192	49	1	1	16			0	0		0	0	0	1	1	1	0	1	10	0	0	0	1	0	0	0	1	2	1	1	1	1	1	0	1	1	1	0	3.3	39	52	57	3.4	10.7	53	4.6	5.7	41
193	56	0	0		0		0	0		0	0	0	1.5	0	0	0	1	8	1	0	1	0	0	0	0	0	0	0	1	0	1	0	0	0	0	0	0	1.9	37	16.9	50	7.6	5.3	29	10.5	1.3	26
194	58	0	0		0		1	0		0	0	0	2	1	0	1	0	0	1	0	1	1	1	1	1	1	5	1	1	0	1	1	1	1	1	1	1	0		27.5	50	3.7	7.9	44		0
195	63	1	1	10			0	0		0	0	0	6	0	0	0	1	10	1	0	1	1	1	1	1	1	5	1	1	1	0	1	0	1	1	1	1	7.1	43	8.1	42	6.4	5.4	53	5.4	2.1	37
196	68	0	0		1	2	1	0		0	0	0	30	0	0	0	0	0	1	0	1	1	0	0	0	1	2	1	0	0	0	1	0	0	1	0	0	2.7	44	65.2	53	3.4	10.7	55	4.9	0.2	38
197	69	0	0		0		0	0		0	0	0	1.5	0	0	0	1	5	1	0	1	1	1	1	1	1	5	1	0	0	0	1	0	1	1	0	0	2.9	38	28.9	53	3.4	11.2	52	5.2	1.7	40
198	42	1	0		0		0	0		0	0	0	10	0	0	0	1		1	1	1	1	0	0	0	1	2	1	1	0	1	1	0	0	1	0	0	0		19	40	4.5	10	29	8.2	1.4	21
199	44	1	0		0		0	0		0	0	0	1	1	0	1	1	10	1	1	1	1	1	1	1	1	5	1	1	0	1	1	1	1	1	0	0	0		4.6	50	3.4	7.7	51		0
200	73	0	0		0		0	0		0	0	0	11	0	0	0	0		1	0	1	0	0	0	0	0	0	0	0	0	0	1	1	1	1	0	0	1.6	38	32	57	3.2	7.8	56	5.9	2.1	40
201	80	0	0		0		1	0		0	0	0							1	0	1	1	0	0	1	0	2	1		0			0	0				2.7	40	41	62	4.1	7.8	59
202	68	0	1	31			1	0		0	0	0	11	1	0	1	1	10	1	1	1	1	0	1	1	1	4	1	1	1	1	1	1	1	1	1	1	0		0		6.9	0.9	35	6.5	0.1	32
203	69	0	1	25			1	1		0	0	0	10	1	1	1	1	8	1	0	1	1	1	1	1	1	5	1	1	1	1		1	1	1	1	1	0		10.1	57	3.6	13.5	53	6.9	0.1	25
204	62	0	1	8			0	0		0	1	0	6	1	1	0	0		1	0	1	1	0	1	1	1	4	1	1	1	1	1	1	1	1	1	1	6.6	42	16.6	47	4.2	11.1	47	5.9	0.7	39
205	67	0	1	32			0	0		0	0	0	6	0	0	0	0		1	0	1	1	0	1	1	1	4	1	0	0	0	1	0	0	1	0	0	1.8	37	19.2	57	3.4	10.3	54	4.4	3.4	42
206	52	1	0		0		1	0		1	0	0	4	0	0	0	0		1	0	1	1	0	0	1	0	2	1	0	0	0	0	0	0	0	0	0	3.9	45	44.1	53	3.5	8.1	54	3.8	2.3	43
207	82	0	0		0		0	0		0	0	0	5	0	0	0	0		1	0	1	1	0	0	0	0	1	1	0	0	0	1	0	1	1			0		23.3	57	3.9	5.6	51		0
208	49	1	0		0		0	0		0	0	0	10	0	0	0	0		1	0	1	1	0	0	0	0	1	1	0	0	0	0	0	0	0	0	0	3.9	45	84.7	53	3.8	10.9	56	6.9	1.1	43
209	76	0	0		0		1	0		0	0	0	15	0	0	0	0		1	0	1	1	1	1	1	1	5	1	0	0	0	1	0	0	1	0	1	0		11.1	53	3.7	3.2	45		0
210	44	0	1	40			0	0		0	0	0	1	1	0	1	1	7	1	0	1	0	0	0	0	0	0	0	1	0	1	0	0	0	0	0	1	3	31	7.5	33	4.9	11.1	49	6.4	0.3	24
211	50	0	1	25			0	0		0	0	0	2	1	1	0	1	8	1	0	1	1	1	1	1	1	5	1	1	1	0	1	1	1	1	0	0	3.4	32	28.7	50	3.4	12.6	49	4.8	2.2	38
212	64	1	0		0		1	0		1	0	0	3	0	0	0	0		1	0	1	0	0	0	0	0	0	0	0	0	0	1	0	1	1	0	0	2	43	63.5	57	2.3	7.5	54	4.1	2.3	45
213	54	1	0				0	0		0	0	0	6	1	1	1	0		1	0	1	0	0	0	1	1	2	1	1	1	1	0	0	0	0	1	1	11.7	50	59.5	62	2.6	8.6	55	5.3	1.8	46
214	77	0	0		0		1			0	0	0	4	0	0	0	0		1	0	1	1	0	1	1	1	4	1	0	0	0	1	0	0	1	0		1.4	41	42.2	62	3.4	5.9	58	5.7	0.6	37
215	73	0	0		0		0	0		0	0	0	2	1	1	1	1	5	0	0	0	1	0	0	0	1	2	1	1	1	0	1	0	1	1	0	1	2.3	38	28.8	57	3	9.7	57	4	2.1	42
216	74	0	0		0		1	0		0	0	0	2	0	0	0	1	8	1	0	1	1	0	0	0	0	1	1	1	0	1	1	0	1	1	1	1	1.8	40	24.2	53	3.8	6.3	54	4.8	1.6	43
217	57	1	1	4			0	1		0	0	0	4	0	0	0	1	10	1	0	1	1	0	1	1	1	4	1	0	0	0	1	0	1	1	1	1	4.8	42	19.7	38	4.1	7.1	53	3.9	4.1	45
218	57	1	1	11			0	0		0	1	0	3	0	0	0	1	10	1	0	1	1	0	1	1	1	4	1	0	0	0	1	1	1	1	1	0	3.2	47	45.7	57	3.3	7.4	55	4	4.1	45
219	75	0	0		0		1	0		0	0	0	4				0		0	0	0																	0		10.8	50	4.2	4	47
220	49	0	0		0		0	0		0	0	0	1	1	0	1	1	6	1	0	1	1	1	1	1	1	5	1	1	0	1	1	1	1	1	1	1	1.5	33	6.9	44	10	4.1	38	15.6	1.1	18
221	25	1	1	9			1	1		0	0	0	10	0	0	0	1	10	1	0	1	1	1	1	1	1	5	1	0	0	0	1	0	0	1	1	1	0		11.7	58	3.2	9.4	52	3.7	4.6	40
222	41	1	1	2			1	0		0	0	0	2	0	0	0	1		1	0	1	1	0	1	1	1	4	1	0	0	0	0	0	0	0	0	0	0							4.1	3.6	36
223	56	0	1				0	0		0	0	0	3	0	0	0	0		1	0	1	1	0	0	1	0	2	1	1	0	1	0	0	0	0	0	0	0		3	40	5.5	6.3	38		0
224	50	1	1				1	1		0	0	0	1.8	1	0	1	0		1	0	1								1	0	1	1	0	0	1	1	0	0								0
225	19	0	0		0		0	0		0	0	0	8	1	0	1	0		0	0	0	1	0	0	0	0	1	1	1	0	1	1	1	1	1	1	1	0		3.5	39	5.4	1.5	34	6.3	0.9	29
226	48	0	0		0		0	0		0	0	0	0.333333	0	0	0	1		1	1	1	1	0	1	1	1	4	1	1	1	1	0	0	0	0	1	0	3.3	34	72.2	47	4.2	13.6	50	8	2.9	40
227	48	1	0		0		0	0		0	0	0	2	0	0	0	1		1	0	1	0	0	0	0	0	0	0	1	1	1	0	0	0	0	0	1	33.5	50	237.8	53	2.8	10.3	57	4.9	2.5	44
228	51	0	0		0		0	0		0	0	0	0.666667	0	0	0	0		1	0	1	0	0	0	0	0	0	0	0	0	0	0	0	0	0	0	0	26	48	128.3	57	4.1	9	55	4.8	6.2	44
229	52	1	0		0		0	0		0	0	0	4	0	0	0	0		1	0	1	0	0	0	0	0	0	0	0	0	0	0	0	0	0	0	0	11.5	50	52.8	47	3.9	8.3	55	3.8	6.6	47
230	71	0	0		0		1	0		0	0	0				0	0		0	0	0	1	0	0	0	0	1	1					0		0	0	0	1.8	42	39	62	3.7			5.5	3.6	42
231	69	0	0		0		0	0		0	0	0	3	1	0	1	0		0	0	0	0	0	0	0	0	0	0	1	0	1	1	1	1	1	1	0	12.1	48	13.7	47	4.8	5.1	53	4.9	3.7	41
232	59	1	0		0		0	0		0	0	0	4	0	0	0	0		0	0	0	1	0	0	0	0	1	1	0	0	0	0	0	0	0	0	0	0		24.4	53	3.7	9.7	55	4.1	1.2	38
233	41	0	1	17			1	0		1	0	0	10	0	0	0	1	4	1	0	1	1	0	1	1	1	4	1	0	0	0	1	1	1	1	0	0	0		1.8	33	4.8	10.5	50	5.9	0.3	28
234	87	1	1	19			1	0		0	0	0	5	0	0	0	1	8	1	0	1	1	1	1	1	1	5	1	0	0	0	1	1	1	1	1	1	0		1.7	40	6.1	6	43	5.2	0.3	33
235	79	1	1	25			1	0		0	0	0	20	1	1	1	1	10	1	0	1	1	1	1	1	1	5	1	1	1	1	1	0	0	1	1	1	0		12	38	4	6.8	41	3.2	4.7	40
236	69	0	0		0		0	0		0	0	0	10	1	1	1	1		1	0	1	1	0	0	1	0	2	1	0	0	0	1	1	1	1	0	0	3.1	39	43.6	53	3.3	9.3	52	5.7	2	38
237	65	0	0		0		1	1		0	0	0	16	1	1	1	1	9	1	0	1	1	0	1	1	1	4	1	1	1	1	1	0	1	1	0	0	0		17.9	44	3.9	5	45		0
238	86	0	0		0		0	0		0	0	0	0.25	1	0	1	0		0	0	0	1	0	0	1	0	2	1	1	0	1	1	1	1	1	1	1	0		40.4	53	3.4	7.7	53	5.2	0.7	38
239	56	0	0		0		0	0		0	1	0	0.5	1	0	1	0		1	0	1	0	0	0	1	0	1	1	1	0	1	1	0	1	1	1	1	1.5	39						3.4	1	44
240	73	0	0		0		0	0		0	0	0	5	0	0	0	0		1	0	1	0	1	0	1	1	3	1	0	0	0	1	0	0	1	0	1	0		0		4.8	7.3	46	3.4	0.3	37
241	18	0	0		0		0	0		0	0	0	1	1	0	1	0		1	0	1	0	0	0	0	0	0	0	0	0	0	0	0	0	0	0	0	7.9	44						7	5.3	36
242	38	1	0		0		0	0		0	0	0	20	1	0	1	0		1	1	1	0	0	1	0	0	1	1	1	0	1	1	0	1	1	0	0	6	39	16.1	32	7.2	4.4	50	6.4	1	35
243	79	0	0		0		0	0		0	0	0	1	1	1	1	1		1	1	1	1	1	1	1	1	5	1	1	1	1	1	0	1	1	1	1	0		21.9	50	3.1	0.7	53	5	0.3	27
244	38	0	0		0		0	0		0	1	0	1	0	0	0	0		1	0	1	0	0	0	0	0	0	0	0	0	0	0	0	0	0	0	0	3.9	41	78.6	62	3.8	6.8	60	4.3	2.8	42
245	67	0	0		0		1	1		0	0	0	10	1	0	1	1	6	0	0	0	1	0	0	0	0	1	1	1	0	1	1	1	1	1	1	1	5	35	3.3	36	7.1	0.2	45		0
246	65	1	0		0		1	1		0	0	0	1	0	0	0	0		1	0	1	1	0	1	1	1	4	1	0	0	0	1	0	0	1	0	0	0		33.2	50	3.7	6.6	53	6.1	2.2	41
247	50	0	0		0		1	0		0	1	0	0.333333	1	1	1	0		1	0	1	1	0	0	1	0	2	1	1	1	1	1	1	1	1	1	1	6.8	38	29.7	67	2.7	9.1	57	4	4.4	29
248	44	1	0		0		0	0		0	1	0	7	1	1	1	1		1	0	1	1	0	0	1	0	2	1	1	1	1	1	1	1	1	0	0	8.9	52	25.2	35	6.4	7.9	38	9.2	1.1	25
249	63	0	0		0		0	0		0	0	0	0.666667	1	0	1	1		1	0	1	1	0	0	1	0	2	1	1	0	1	1	1	1	1	0	0	2.3	42	9.1	37	4.6	5.7	46	4.5	0.3	33
250	57	0	0		0		1	0		0	0	0	11	1	1	1	1	9	1	0	1	1	0	1	1	0	3	1	1	0	1	0	0	0	0	0	1	2.8	45	19.1	57	3.5	10.4	55	3.8	2.6	38
251	48	1	0		0		0	0		0	0	0	10	1	1	1	0		1	1	1	0	0	0	0	0	0	0	1	1	1	1	1	1	1	1	1	0		3.2	35	5.5	3.5	44	4.8	0.5	36
252	78	0	0		0		0	1		0	0	0	0.833333	1	0	1	0		1	0	1	1	0	0	1	1	3	1	1	0	1	1	0	1	1	1	1	0		7.8	43	4.9	2.4	47		0
253	41	1	1	15			0	0		0	0	0	5	1	1	1	1	8	1	1	1	1	1	1	1	1	5	1	1	1	1	1	1	1	1	0	1	2.8	47	9	44	3.8	8.2	44	5.9	0	29
254	50	1	0		0	0	0	0		0	1	0	2	1	0	1	0		0	0	0	0	0	0	0	0	0	0	1	0	1	0	0	0	0	0	0	19.4	52	60.7	67	3.3	3.6	31	4.9	3.5	48
255	70	1	1	10			0	0		0	0	0	7	1	0	1	0		1	0	1	1	0	0	0	0	1	1	1	0	1	1	0	1	1	1	1	1.8	44	6.1	44	6.6	2.9	49	4.3	1.4	44
256	47	0	0		0		0	0		0	0	0	1.6	0	0	0	0		1	0	1	1	0	0	1	0	2	1	0	0	0	0	0	0	0	0	0	0		24	57	3.2	8.5	54		0
257	78	1	0		0		1	1		0	0	0	0.666667	1	1	0	1		1	1	1	1	0	0	1	0	2	1	1	1	0	1	0	0	1	1	1	0		42.7	57	3	6.4	54	6.1	1.4	38
258	79	0	0		0		1	0		0	0	0	5	1	0	1	0		1	0	1	1	1	1	1	1	5	1	1	0	1	1	1	1	1	1	1	0		0		5.9	4.5	45	7.7	0.1	25
259	71	0	0		0		0	0		0	0	0	0.833333	1	0	1	1		1	0	1	1	0	0	1	0	2	1	1	0	1	1	0	0	1	0	0	0		0		4.3	1.6	52	5.2	1.1	39
260	64	1	0		0		1	0		0	0	0	5	0	0	0	1		1	0	1	1	0	0	1	0	2	1	0	0	0	0	0	0	0	0	0	2.3	50	5	44	3.4	8.6	60	5	3.7	45
261	69	0	1	4			1	1		0	0	0	7	1	0	1	1	7	1	0	1	1	0	1	1	1	4	1	0	0	0	1	1	1	1	0	1	3	42	22.6	43	4	9.5	50	5.2	2.4	40
262	52	1	1	9			1	1		0	0	0	10	0	0	0	0		1	0	1	1	0	1	1	1	4	1	0	0	0	1	0	0	1	0	0	2.8	41	24	62	3.1	10.5	56	4.4	3.1	37
263	59	1	1	20			1	1		0	0	1	2	1	1	1	1	8	1	0	1	1	0	1	1	1	4	1	1	1	0	1	0	1	1	1	1	3.1	38	13.9	41	4.3	12.2	52		0
264	71	0	0		0		1	1		0	0	0	4	1	1	0	1	10	1	0	1	1	1	1	1	1	5	1	0	0	0	1	0	1	1	1	1	0		3.4	50	3.4	4.5	50		0
265	63	0	0		0		1	1		0	0	0																										2.1	44	5	50	5.7	4.1	55	3.4	2	43
266	79	1	1				1	0		0	0	0	25	1	1	0	1	10	1	0	1	0	0	1	1	0	2	1	1	1	1	1	1	1	1	1	1	0		0		10.8	2.8	44	3.3	2.9	45
267	53	1	1	40			0	0		0	0	0	4	0	0	0	1	4	1	1	1	1	0	0	0	0	1	1	0	0	0	1	1	1	1	1	1	1.1	32	27.1	50	3.7	8.5	46	5.6	0.4	26
268	73	0	0		0		0	0		0	0	0	0.666667	0	0	0	0		0	0	0	1	0	0	0	0	1	1	0	0	0	1	0	0	1	0	1	3.7	41	27.9	62	3.6	5.2	56	4.2	1.4	41
269	59	1	0		0		1	1		1	0	0	3	1	0	1	1	8	1	0	1	1	1	1	0	0	3	1	0	0	0	1	1	0	0	1	0	0		28.5	47	3.6	5.6	55	3.9	2.4	37
270	54	1	1	9			0	0		1	0	0	1.33	0	0	0	1	8	1	0	1	1	0	1	1	1	4	1	0	0	0	1	0	0	1	0	1	3.3	39	4.9	44	4.2	5.4	48	4.9	6	42
271	46	1	1	40			0	0		0	0	0	2	1	1	1	1		0	0	0	0	0	1	0	1	2	1	0	0	0	0	0	0	0	0	0	3.3	39	50.5	53	3.9	9.9	51	4.5	3.2	38
272	60	0	1	1			1	0		0	0	0	0.5	0	0	0	1	10	1	0	1	1	0	1	1	1	4	1	0	0	0	1	1	0	1	0	0	4.2	43	24.6	56	3.2	7.9	57	3.3	2.2	45
273	62	0	0		0		0	0		0	0	0	2	0	0	0	0		1	0	1	0	0	0	0	0	0	0	0	0	0	1	0	1	1	0	0	1.8	38	12.9	42	4.5	7.2	47	4.6	2.5	38
274	61	0	0		0		0	0		0	0	0	5	1	0	1	0		0	0	0	1	1	1	1	1	5	1	1	0	1	1	1	1	1	1	1	0		7	47	4.1	3.1	53		0
275	56	0	1	20			1	1		0	1	0	0.75	1	1	1	1		1	0	1	1	1	1	1	1	5	1	1	1	1	1	1	1	1	1	1	0		2.3	40		0			0
276	82	1	0		0		1	1		0	0	0	8	1	0	1	1	7	1	0	1	1	1	0	1	0	3	1	1	0	1	1	1	1	1	1	1	0		0		9.2	2.8	48		0
277	60	1	0		0		0	0		1	0	0	7	1	1	1	1	10	1	0	1	1	0	1	1	1	4	1	0	0	0	0	0	0	0	0	0	2.5	45	59.4	57	3.2	9.9	61	4.4	3.9	44
278	74	0	0		0		1	0		0	0	0	0.5	1	0	1	0		0	0	0	0	0	0	0	0	0	0	1	0	1	0	0	0	0	0	0	0		44.2	67	3.6	6.7	57	4.5	1	42
279	48	0	1	4			0	1		1	0	0	4	0	0	0	1	8	1	0	1	1	1	1	1	1	5	1	0	0	0	1	0	0	1	0	0	11.9	47	46	67	3	8.6	60	4.6	5.9	49
280	24	0	0				0	0		0	0	0	11	0	0	0	1	5	1	0	1	1	1	1	1	1	5	1	0	0	0	0	0	0	0	0	0	0		3.1	42	2.8	11.2	55	12	0	36
281	62	0	1	11			1	1		0	0	0	1.75	0	0	0	0		1	0	1	1	0	1	0	1	3	1	0	0	0	0	0	0	0	0	0	6.5	46	57.6	50	4.9	5.5	51	4.8	3.4	43
282	46	1	0				1	0		0	1	1	3	0	0	0	1	8	1	0	1	1	1	1	1	1	5	1	0	0	0	0	0	0	0	0	0	1.4	42	58.3	57	3	10.4	55	4.4	3.6	42
283	50	0	0				0	0		0	0	0	1	0	0	0	0		1	0	1	1	0	1	1	1	4	1	0	0	0	0	0	0	0	0	0	7.2	50	44.8	44	3.7	9.8	55	4.5	3.8	42
284	33	0	0				0	0		0	0	0	1.5	0	0	0	1	9	1	0	1	1	0	1	1	0	3	1	0	0	0	0	0	0	0	0	0	7.5	40	146.5	53	3.4	8.2	59	4.7	6.7	43
285	68	0	0				1	0		0	0	0	12	1	0	1	1		1	0	1	1	0	0	0	1	2	1	1	0	1	1	0	0	1	1	1	3.8	31	18.7	53	4	11	52		0
286	46	1	0				1	0		0	0	0	4	0	0	0	0		1	0	1	1	0	0	1	0	2	1	0	0	0	1	0	0	1	0	0	0		35.8	62	3	6.6	52		0
287	62	0	0		0		1	0		0	0	0	1.8	0	0	0	1	6	1	0	1	1	0	1	1	1	4	1	0	0	0	0	0	0	0	0	0	2.8	39	27.8	57	3.2	9.6	53	4.4	3.8	37
288	50	1	1	25			1	0		1	0	0	5	1	1	1	1	8	1	0	1	1	0	1	1	1	4	1	0	0	0	1	1	1	1	1	1	2.8	31	31.4	53	3.5	4.8	45	9.8	0.3	32
289	66	0	1	0.2			0	0		0	1	0	6	1	1	1	1	8	1	0	1	1	1	1	1	1	5	1	1	0	1	1	1	0	1	0	1	2.7	42	36.3	57	3.8	6.7	50	4.9	0.6	33
290	59	0	0		0		0	0		0	0	0	5	0	0	0	0		1	0	1	1	0	0	1	0	2	1	0	0	0	1	0	0	1	0	0	10.9	47	108.5	53	3.5	8.6	55	6.6	2.3	37
291	23	0	0		0		0	0		0	0	0	5	0	0	0	0		1	0	1	0	0	0	0	0	0	0	0	0	0	1	1	0	0	0	0	8.2	41	101.5	53	4.5	8.8	53	6.6	5.5	44
292	64	0	0		0		0	0		0	0	0	0.8	0	0	0	0		1	0	1	1	0	0	1	0	2	1	0	0	0	1	0	1	1	0	0	3.5	38	27.3	57	3.2	11.8	53	4.3	3.6	38
293	68	0	0		0		1	0		0	0	0	1	0	0	0	1	5	1	0	1	1	0	0	0	0	1	1	0	0	0	1	0	1	1	0	1	3.5	38	15.3	53	3.3	14.5	52	4.9	2.8	39
294	62	0	0		0		1	0		1	0	0																										0		12.4	43	4	5.9	50	3.8	2.4	38
295	73	1	1	15			0	0		0	0	0	1.5	0	0	0	0		1	0	1	1	1	1	1	1	5	1	0	0	0	0	0	0	0	0	0	0		12.1	32	5.2	8.9	53	5.1	3	41
296	55	0	1	16			0	0		0	0	0	1	1	1	1	0		1	0	1	1	1	1	1	1	5	1	1	0	1	1	1	1	1	1	1	0		0		4.2	4.3	45	6.9	0.2	27
297	44	1	0		1		0	0		0	0	0	0.5	1	0	1	0		1	0	1	1	0	0	0	0	1	1	0	0	0	0	0	0	0	0	0	6.7	31	21.7	42	4.8	11.7	54	8.8	0.2	31
298	76	0	0		0		1	0		0	0	0	6	0	0	0	0		1	0	1	0	0	0	0	0	0	0	0	0	0	1	1	1	1	0	0	1.6	38	25.4	50	4.1	4.5	50	4.2	2	36
299	69	0	0		0		1	0		1	0	0	1	0	0	0	1	5	1	0	1	1	0	0	1	0	2	1	0	0	0	1	0	1	1	0	1	0		31.2	50	4.4	1.8	49	4.1	2.5	36
300	25	0	1	15			0	0		0	0	0	1	0	0	0	1	10	1	0	1	0	0	1	1	1	3	1	0	0	0	1	1	1	1	0	0	9.2	45	17.1	44	3.5	16.2	47	6.4	2.2	39
301	59	0	0		0		0	0		0	0	0	2	1	0	1	1	8	0	0	0	1	0	1	0	0	2	1	1	1	1	1	1	1	1	1	1	0		4.8	40	4	7.8	36		0
302	64	1	0		0		1	0		1	0	0	4	0	0	0	0		1	0	1	1	1	1	1	1	5	1	1	1	0	1	0	0	1	0	0	3.6	40	47.1	44	3.6	8.4	44	4.5	3.4	40
303	57	0	0		0		0	0		0	0	0	10	0	0	0	1	5	1	0	1	0	0	1	0	0	1	1	0	0	0	0	0	0	0	0	0	2.4	41	37.8	57	3.1	8.3	57	5.2	5.3	42
304	68	1	1				1	0		0	0	0	35	1	0	1	0		1	0	1	1	0	1	1	0	3	1	1	1	1	1	1	1	1	1	1	3.1	39	16	38	6.1	4	46	4.4	3	41
305	38	0	1	12				0		0	0	0	1	1	1	1	1	8	1	0	1	1	1	1	1	1	5	1	1	1	1	1	0	1	1	1	1	0		6.3	53	3.9	10	50		0
306	29	0	1	4			0	0		0	1	0	1	0	0	0	1	7	1	0	1	0	0	1	1	1	3	1	0	0	0	1	1	1	1	0	0
307	61	0	1				1	0		0	0	1	0.1	1	1	0	1	5	1	0	1	1	1	1	1	1	5	1	1	1	1	1	0	0	1	1	1	0		0		4.9	6.6	35		0
308	77	0	0		0		0	0		0	0	0	7	0	0	0	0		1	0	1	1	1	1	1	1	5	1	0	0	0	1	0	1	1	0	0	0		41.7	47	4.4	6.6	55		0
309	17	0	0		0		0	0		0	0	0	2	1	0	1	0		0	0	0	0	0	0	0	0	0	0	1	0	1	1	1	0	1	1	1	3.4	33	9	44	3.5	6.4	35	5	0.5	30
310	78	0	0		0		1	0		0	0	0	10	1	1	1	1		1	0	1	1	0	0	0	1	2	1	1	0	1	1	1	1	1	0	0	0		33.7	50	3.4	9.5	50		0
311	92	0	1	9			1			0	0	0	10	1			1	5	0	0	0	1	0	1	1	1	4	1	1	1	1	1	0	0	1	1	1	1.8	34	82.8	53	3.9	5.6	46	6	0.2	34
312	59	0	0		0		1	1		0	1	1	15	1	0	1	1		1	0	1	1	1	0	1	0	3	1	1	0	1	1	1	1	1	0	1	0		15.4	53	3.8	5.6	50	6.9	0.1	31
312	59.7244	M:	93		6		135	52		29	53	34	5.21371	132	60	105	138	7.02632	263	27	258	219	107	123	212	166	2.77181	258	141	55	131	228	133	156	221	125	146											37
		216	312	90	180	3	308	298		308	312	312		284	272	273	281	95	300	299	299	299	294	274	295	278	298	299	300	301	300	296	300	299	298	289	272
		F:	0.298077		0.0333333		0.438312	0.174497		0.0941558	0.169872	0.108974		0.464789	0.220588	0.384615	0.491103		0.876667	0.090301	0.862876	0.732441	0.363946	0.448905	0.718644	0.597122	0.00930138	0.862876	0.47	0.182724	0.436667	0.77027	0.443333	0.521739	0.741611	0.432526	0.536765
		96
Controls	58	0					0				0											0	0	0	0	0								0	0
	62	0					0				0											0	0	0	0	0								0	0
	68	0					0				0											0	0	0	0	0								0	0
	66	0					0				0											0	0	0	0	0								0	0
	68	0					1				0											1	0	1	1	1								0	1
	57	1					0				0											0	0	0	0	0								0	0
	65	1					1				0											0	0	0	0	0								0	0
	61	1					0				0											1	0	0	0	0								0	2
	70	0					0				0											0	0	0	0	0								0	0
	60	0					0				0											1	1	1	1	1								0	0
	57	0					0				0											1	0	0	0	0								0	0
	72	0					0				0											0	0	0	0	0								0	0
	61	0					0				0											0	0	0	0	0								0	0
	68	1					0				0											0	0	0	0	0								0	0
	54	0					0				0											0	0	0	0	0								0	1
	66	0					1				0											0	0	0	0	0								0	1
	78	0					0				0											0	0	0	0	0								0	1
	64	0					1				1											0	0	0	0	0								0	1
	78	1					1				.											1	0	0	0	0								0	2
	79	0					0				0											1	0	0	0	0								0	0
	74	1					0				0											0	0	0	0	0								0	1
	55	0					0				0											1	0	0	0	0								0	0
	53	1					0				0											0	0	0	0	0								0	0
	53	1					0				0											0	0	0	0	0								0	0
	61	1					0				0											0	0	0	0	0								0	1
	51	0					0				0											1	0	0	0	0								0	0
	68	0					1				0											1	0	0	1	1								0	0
	69	0					1				0											0	0	0	0	0								1	2
	68	0					0				0											1	0	0	0	0								0	0
	70	1					0				0											0	0	0	0	0								0	1
	71	1					0				0											0	0	0	1	1								0	0
	60	1					1				.											0	0	0	0	1								0	1
	58	1					0				0											0	0	0	0	0								0	1
	70	1					0				0											0	0	0	0	0								0	1
	69	0					0				0											0	0	0	0	0								1	1
	51	1					.				0											0	0	0	0	0								0	0
	56	0					0				0											0	0	0	0	0								0	0
	59	1					0				.											0	0	0	0	0								0	0
	58	1					0				0											0	0	0	0	0								0	0
	66	1					0				0											0	0	0	0	0								0	0
	53	1					0				0											0	0	0	0	0								0	0
	59	1					0				0											0	0	0	0	0								0	1
	64	1					0				0											1	0	0	0	0								0	0
	64	1					0				0											0	0	0	0	0								0	0
	61	1					0				0											0	0	0	0	0								0	0
	61	1					0				0											0	0	0	0	0								0	1
	55	1					0				0											0	0	0	0	0								0	1
[truncated: 34 more columns]
